# Supplementary material for: General and COVID-19-Related Mortality by Pre-Existing Chronic Conditions and Care Setting during 2020 in Emilia-Romagna Region, Italy
Source: MDPI journal article supplement (doi:10.3390/ijerph182413224), 2021-12-15
Supplement: s1 [file s1]

\* **Poisson models** for **Mortality Rate Ratios (MRR:  $\exp(\beta_1)$ )** estimates:

STATA code:

```
xi: poisson ly x1 i.x2 if sex==i & age_gr==j, e(pop) irr
```

\* ly=yearly deaths count (total and for each care setting: hospital, Community / Long-term Hospital, hospice, Long-term Care Facilities, home Care, none of the above) stratified for 5-years age groups and sex

\* x1: dummy for year 2020

\* x2: 5-years age classes

\* age\_gr: two age groups 18-74 and 75+ years old

\* pop: population at January the 1st of each of the 6 years (offset).

\* **Log-binomial models** for **Prevalence Ratios (PR:  $\exp(\beta_d)$ )** estimates:

STATA code:

```
xi: glm y2020 x1 x2 x3 x4 x5 x6 x7 i.x8, link(log) family(binom) eform
```

\* y2020: dummy for death occurred in 2020

\* x1, ..., x7: dichotomic variables, one for each chronic condition (cardiovascular, cancer, respiratory, metabolic, neuropsychiatric, musculoskeletal, none of the above conditions)

\* x8: 5-years age classes.
