# Supplementary material for: General and COVID-19-Related Mortality by Pre-Existing Chronic Conditions and Care Setting during 2020 in Emilia-Romagna Region, Italy
Source: Int J Environ Res Public Health. 2021 Dec 15;18(24):13224. doi: 10.3390/ijerph182413224 (PMC8701253; doi:10.3390/ijerph182413224)
Supplement: Supplementary file 1 [file ijerph-18-13224-s001.zip]

Archive with 5 entries (5 files):
- Figure S1.xlsx
- STATA commands for models.pdf
- Table S1.xlsx
- Table S2.xlsx
- Table S3.xlsx
