# Supplementary material for: General and COVID-19-Related Mortality by Pre-Existing Chronic Conditions and Care Setting during 2020 in Emilia-Romagna Region, Italy
Source: Int J Environ Res Public Health. 2021 Dec 15;18(24):13224. doi: 10.3390/ijerph182413224 (PMC8701253; doi:10.3390/ijerph182413224)
Supplement: Supplementary file 1 [file ijerph-18-13224-s001.zip › Figure S1.xlsx]

## Sheet: Figure S1
Frequency of selected deaths flow-chart. Emilia-Romagna, 2015-2020.
