# Supplementary material for: General and COVID-19-Related Mortality by Pre-Existing Chronic Conditions and Care Setting during 2020 in Emilia-Romagna Region, Italy
Source: Int J Environ Res Public Health. 2021 Dec 15;18(24):13224. doi: 10.3390/ijerph182413224 (PMC8701253; doi:10.3390/ijerph182413224)
Supplement: Supplementary file 1 [file ijerph-18-13224-s001.zip › Table S1.xlsx]

## Sheet: Table S1
Codes algorithms used to identify diseases from administrative databases.
	DISEASES	ICD 9-CM MAIN/SECUNDARY DIAGNOSIS CODES (Hospital discharge records)	ATC CODES (Pharmaceutical database)	Number of prescriptions	DISEASE EXEMPTION CODES	Group
1	Hypertension	401*-405*			"0031", "0A31"	Cardiovascular
2	Diabetes mellitus	(cod_pat=250 and MDC=014) cod_pat=6480	A10A, A10B	>1	“013”	Metabolich
3	Hyperlipidemia	2720, 2721, 2722, 2723, 2724	C10AA, C10AB, C10AC, C10AX, C10BA	>3		Metabolich
4	Thyiroid disease	2420, 2421, 2422, 2423, 2424, 243, 244, 2452	H03AA, H03B, H03C	>1	"056", "035", "027"	Metabolich
5	Ischemic heart disease	410*-414*	C01DA	>2	“0A02.414”	Cardiovascular
6	Cardiac arrhytmias	426*, 427*, V53.3, V45.0	C01B	>4		Cardiovascular
7	Heart failure	39891, 40201, 40211, 40291, 40401, 40403, 40411, 40413, 40491, 40493, 428 - 4289			"021"	Cardiovascular
8	Heart valve diseases	09320, 09321, 09322, 09324, 394-396, 3970, 3971, 4200, 4241, 4242, 4243, V42.2, V43.3			“0A02.394” “0A02.395” “0A02.396”	Cardiovascular
9	Peripheral vascular disease	0930, 4373, 4471, 5571, 5579, V434, 440*, 441*, 443*, 442 - 4429, 4471, 7854				Cardiovascular
10	Asthma	493*			“007”	Respiratory
11	Chronic Obstructive Pulmonary Disease	490*, 491* 492*, 494*, 496* with the exclusion of cases with 493* code in every position	R03	> 5 for more than 120 day; 3-10 from 30 to 120 days; 3-4 from 12° to 210 days	“057”	Respiratory
12	Chronic renal failure	403*, 404*, 5811, 5812, 5821, 5822, 5824, 585, 587, 5900			“023”, “061”	Cardiovascular
13	Gout	274*	M04AA, M04AC, M04AX	>3		Musculoskeletal
14	Cirrhosis	5712, 5715, 5716 5718, 5719, 5722-5724, 4560 - 45629	B02BA, B05AA		"008"	Musculoskeletal
15	Chronic hepatitis	07022, 07023, 07032, 07033, 07044, 07054, 5714, 5718, 5719	L03AB, J05AX	>1	“016”	Musculoskeletal
16	Crohn’s disease and ulcerative colitis	555*, 556*	A07EA, A07EC	>3	“009”	Musculoskeletal
17	Gastroesophageal disease	53011, 53081, 53085, 531, 532, 533, 534, V12.71	Solo AFT: "A02AD", "A02BX"="8.1"/*all*/ A02BA", "A02BC"="8.2"/ *cuf note= 48*/”"A02BB"="8.3"/ * excluded cuf note =1*/	>3		Musculoskeletal
18	Cerebrovascular disease	36234 430* - 438*				Cardiovascular
19	Other neurological pathologies	334*, 335*, 340, 341*, 3481, 3483			"046"	Neuropsychiatric
20	Dementia*	290*, 291.2, 294.0, 294.1, 294.10, 294.11, 292.82, 331.0, 331.1, 331.11, 331.19, 331.2, 331.7, 331.8, 331.82, 331.83, 331.89, 331.9, 046.1	N06DA02, N06DA03, N06DA04, N06DX01 (from 2013 to 2017)	>1	"011", "029"	Neuropsychiatric
21	Parkinson disease	332*, 3330, 3331, 3334, 3335	N04AA, N04AB, N04BA, N04BC, N04BD, N04BX	>3	“038”	Neuropsychiatric
22	Depression	29620-29636, 2965, 29682, 29690, 29699, 2980, 3004, 3090, 3091, 311	N06A	>4		Neuropsychiatric
23	Psychiatric disorders	295*, 2960, 2961, 2964, 2966, 2967, 29680, 29681, 29689, 297*, 2981, 2982, 2983, 2984, 2988, 2989	N05A except N05AN01	>3	"044"	Neuropsychiatric
24	Epilepsy	345*	N03AA, N03AB, N03AD, N03AE, N03AF, N03AG, N03AX, N03AG01 e N03AF01 only with a contemporary hospital admission	>3	“017”	Neuropsychiatric
25	Neoplasms	140 - 14090, 141 - 16590 , 170 - 17190, 172 - 17390, 174 - 17590, 179 - 18490, 185, V1046 , 186 - 1991, 200 - 2038, 2730, 204 - 2089	A04AD12, H01AX01, L01CX01, L02BX03, L03AC01, R05DB27A04AA, H01CB, L01AA, L01AB, L01AC, L01AD, L01AX, L01BA, L01BB, L01BC, L01CA, L01CB, L01CD, L01DA, L01DB, L01DC, L01XA, L01XB, L01XC, L01XD, L01XE, L01XX, L02AB, L02AE, L02BA, L02BB, L02BG, L03AA, L03AX, R05DA	>1	"048"	Cancer
26	Prostatic hyperplasia	600*	G04CA, G04CB	>3		None of the above conditions
27	Reduced vision	3621 3622 36230 - 36233, 36235 - 36237, 36270 - 36276, 36281 - 36289, 36340 - 36342, 36500 - 36506, 36510 - 36513, 36520 - 36524, 36541 - 36543, 36559 - 36565, 36581 - 36589, 36642 - 36646, 37700 - 37775, 36422, 36515, 36531, 36532, 36551, 36552, 3668, 3669	S01EA, S01EB, S01EC, S01ED, S01EE, S01EX	>3	“019” "041" "C05"	None of the above conditions
28	Hearing reduction	3890, 3891, 3892, 3882, 3897, 3898, 3899, 388.01, 388.11			"C06"	None of the above conditions
29	Rheumatologic conditions	7010, 710, 7140, 7141, 7142, 71430, 71431, 71432, 71433, 715, 716, 720, 6960, 6961, 3580	M01AB, M01AC, M01AE, M01AG, M01AH, M01AX, M01CB, M01CC, P01BA	>3	"006" "045" "054" "028" "030" "034" "047"	None of the above conditions
30	Osteoposis and Paget disease	7330, 7310	H05AA02, H05AA03, A12AA, A12AX, G03XC, H05BA, M05BA, M05BB, M05BX	>3	“037”	None of the above conditions
31	Migraine	346*	N02CA, N02CC, N02CX	>3		None of the above conditions
