# Supplementary material for: General and COVID-19-Related Mortality by Pre-Existing Chronic Conditions and Care Setting during 2020 in Emilia-Romagna Region, Italy
Source: Int J Environ Res Public Health. 2021 Dec 15;18(24):13224. doi: 10.3390/ijerph182413224 (PMC8701253; doi:10.3390/ijerph182413224)
Supplement: Supplementary file 1 [file ijerph-18-13224-s001.zip › Table S2.xlsx]

## Sheet: Table S2
Frequency distribution (absolute and column percentage) of dead persons by prevalent chronic condition
and death place, by sex, year and without COVID-19 deaths. Emilia-Romagna 2015-2020.
Age class			Male			Female
	Variable (col %)	Level	2015-2019	2000	2020 not COVID-19	2015-2019	2000	2020 not COVID-19
18-74	(N)		6123	7342	1116	3894.2	4345	3921
	Prevalent chronic conditions	cardiovascular	43	42.2	43.8172	35.9098	35.1438	22.2902
		cancer	37.7	33.9	18.8172	47.4963	45.9379	34.685
		respiratory	15.7	16.6	16.3978	15.5	16.5708	16.7814
		metabolic	43.6	46.6	51.9713	43.9166	46.5823	46.0852
		neuropsychiatric	27.6	29.7	24.9104	37.1373	39.977	39.8113
		musculoskeletal	32.5	32.9	32.4373	35.9869	36.3636	36.2918
		none of the above c.	18.2	18.2	18.19	12.1719	11.8757	11.7572
	Death place	Hospital (excluding long-term hospitalizations)	46.5247	50.7627	43.4238	48.4618	47.664	43.4328
		Community /Long-term Hospital	4.85367	2.73767	3.05123	5.52617	2.87687	3.00944
		Hospice	10.7525	8.53991	9.8924	14.6166	14.2463	15.5062
		Long-term Care Facilities	1.62987	1.82512	1.73438	2.03893	3.06099	2.88192
		Home Care	0.0849229	0.163443	0.17665	0.169483	0.0690449	0.0765111
		None of the above	36.1543	35.9711	41.7215	29.187	32.0829	35.0931
75+	(N)		16598	20431	17281	21771	26044	22779
	Prevalent chronic conditions	cardiovascular	68.5	65.4	65.8469	64.3	60.8	61.0299
		cancer	27.6	26.8	27.9498	16.8	16.8	17.4678
		respiratory	26	23.1	23.5056	17.8	16.6	16.5986
		metabolic	50.1	53	52.8152	44.9	47.5	47.5877
		neuropsychiatric	42.7	43.4	43.6028	55.7	57.9	57.3159
		musculoskeletal	37.6	36.8	37.0117	38.6	37	37.0253
		none of the above c.	6.8	7.1	6.83988	7.3	7.5	7.51569
	Death place	Hospital (excluding long-term hospitalizations)	49.0975	50.952	44.928	41.9511	40.662	36.6917
		Community /Long-term Hospital	9.05991	5.76575	6.30751	8.5225	5.23729	5.39093
		Hospice	5.35835	4.36591	5.06915	3.98244	3.28291	3.67883
		Long term Care Facilities	5.35714	5.986	5.94294	10.2294	11.8914	11.3965
		Home Care	0.212069	0.254515	0.243041	0.315104	0.368607	0.377541
		None of the above	30.915	32.6758	37.5094	34.9995	38.5578	42.4646
18+	(N)		22722	27773	23507	25665	30389	26700
	Prevalent chronic conditions	cardiovascular	61.6	59.3	59.5031	60	57.1	57.161
		cancer	30.3	28.7	30.2408	21.4	21	21.9401
		respiratory	23.2	21.4	21.699	17.5	16.6	16.6255
		metabolic	48.3	51.3	50.9273	44.7	47.4	47.367
		neuropsychiatric	38.7	39.8	40.148	52.8	55.3	54.7453
		musculoskeletal	36.2	35.8	35.941	38.2	36.9	36.9176
		none of the above c.	9.9	10.1	9.84346	8	8.1	8.13858
	Death place	Hospital (excluding long-term hospitalizations)	40.2	42.5	44.5295	34.5	32.3	37.6816
		Community /Long-term Hospital	8.6	6.7	5.44495	6.7	5.6	5.0412
		Hospice	10.2	7.4	6.34678	9.9	7	5.41573
		Long-term Care Facilities	7.5	8.2	4.82814	13.3	15.1	10.1461
		Home Care	1.3	1.5	0.225455	1.5	2.1	0.333333
		None of the above	32.3	33.8	38.6251	34.1	37.8	41.382
