# Supplementary material for: General and COVID-19-Related Mortality by Pre-Existing Chronic Conditions and Care Setting during 2020 in Emilia-Romagna Region, Italy
Source: Int J Environ Res Public Health. 2021 Dec 15;18(24):13224. doi: 10.3390/ijerph182413224 (PMC8701253; doi:10.3390/ijerph182413224)
Supplement: Supplementary file 1 [file ijerph-18-13224-s001.zip › Table S3.xlsx]

## Sheet: Table S3
Specific chronic conditions prevalences among deaths (%).
		Male		Female
Age class	Cronich (%)	2015-2019	2020	2015-2019	2020
18-74		6123.2	7342	3894.2	4345
	Hypertension	30.7813	28.2212	26.1877	23.8205
	Diabetes mellitus	25.1045	25.4835	20.0966	20.8746
	Hyperlipidemia	29.3474	31.2177	24.0357	25.7998
	Thyiroid disease	5.57225	6.40153	17.3283	17.9287
	Ischemic heart disease	14.7668	13.1572	6.95393	6.49022
	Cardiac arrhytmias	10.2855	10.1471	7.57537	6.26007
	Heart failure	9.50483	8.48543	7.99651	7.20368
	Heart valve diseases	2.7012	2.57423	2.61414	2.53165
	Peripheral vascular disease	6.67298	5.74775	3.44615	2.89988
	Asthma	0.731644	0.871697	1.34559	1.17376
	Chronic Obstructive Pulmonary Disease	14.7015	14.4375	13.99	14.1772
	Chronic renal failure	3.83786	4.08608	2.71173	3.24511
	Gout	11.8761	13.5249	7.97596	8.56157
	Cirrhosis	5.91194	4.67175	3.71321	3.01496
	Chronic hepatitis	4.85041	4.0316	3.45642	2.85386
	Crohn’s disease and ulcerative colitis	1.79971	1.75701	1.69483	1.68009
	Gastroesophageal disease	5.40894	5.36639	5.89595	6.67434
	Cerebrovascular disease	9.29906	8.37646	7.73458	7.31876
	Other neurological pathologies	2.01529	1.92046	2.73227	2.39356
	Dementia*	5.25869	5.29828	6.31195	7.04258
	Parkinson disease	3.26627	3.40507	3.138	3.42923
	Depression	12.9377	12.2174	22.3563	21.542
	Psychiatric disorders	6.65012	7.46391	8.23789	10.1036
	Epilepsy	10.7983	12.1493	13.6973	14.9137
	Neoplasms	37.5033	32.5524	47.3319	44.7181
	Prostatic hyperplasia	14.7668	16.1264	0.0616301	0
	Rheumatologic conditions	9.5473	8.79869	15.048	13.5558
	Osteoposis and Paget disease	3.5439	3.13266	11.1961	9.87342
75+		16598.4	20431	21770.6	26044
	Hypertension	48.2998	44.1094	47.8535	43.0617
	Diabetes mellitus	25.3603	25.8871	20.3724	20.2887
	Hyperlipidemia	33.8864	36.8362	24.1206	26.34
	Thyiroid disease	7.18985	7.36626	15.2609	15.8424
	Ischemic heart disease	25.9121	21.487	17.734	13.4311
	Cardiac arrhytmias	27.4978	24.874	23.0347	21.2794
	Heart failure	22.0262	19.6026	21.2387	19.5669
	Heart valve diseases	6.21867	5.34971	6.36179	5.52526
	Peripheral vascular disease	9.40814	7.49351	4.55844	3.55552
	Asthma	0.438596	0.327933	0.598973	0.468438
	Chronic Obstructive Pulmonary Disease	25.4543	21.7562	17.1479	14.9593
	Chronic renal failure	4.35102	4.38549	2.12305	1.86223
	Gout	21.2792	21.5359	14.8384	15.2857
	Cirrhosis	2.14238	1.7914	1.64718	1.22869
	Chronic hepatitis	2.14479	1.76692	2.14234	1.57042
	Crohn’s disease and ulcerative colitis	1.56401	1.63967	1.30635	1.47443
	Gastroesophageal disease	5.83189	5.61891	5.32645	5.02611
	Cerebrovascular disease	20.7249	18.0461	20.2163	17.8966
	Other neurological pathologies	0.757904	0.773335	0.598054	0.725695
	Dementia*	21.6997	20.4444	32.3886	31.7002
	Parkinson disease	7.65736	7.57183	5.69759	5.73645
	Depression	21.1117	20.5668	29.1411	29.4962
	Psychiatric disorders	6.58015	7.66972	8.35071	9.86408
	Epilepsy	7.64893	7.88508	8.01356	8.60851
	Neoplasms	27.5135	25.7158	16.7189	15.6735
	Prostatic hyperplasia	37.9458	38.838	0.0597136	0.0806328
	Rheumatologic conditions	9.28764	7.91934	12.9073	10.4976
	Osteoposis and Paget disease	4.5414	3.74431	12.6878	10.8393
18+		22721.6	27773	25664.8	30389
	Hypertension	43.5788	39.9093	44.5661	40.3106
	Diabetes mellitus	25.2914	25.7804	20.3306	20.3725
	Hyperlipidemia	32.6632	35.3509	24.1077	26.2628
	Thyiroid disease	6.75393	7.11122	15.5746	16.1407
	Ischemic heart disease	22.9086	19.2849	16.0983	12.4387
	Cardiac arrhytmias	22.8593	20.9808	20.689	19.1319
	Heart failure	18.6519	16.6637	19.2295	17.7992
	Heart valve diseases	5.27076	4.61599	5.79315	5.09724
	Peripheral vascular disease	8.67104	7.03201	4.38967	3.46178
	Asthma	0.517569	0.471681	0.71226	0.569285
	Chronic Obstructive Pulmonary Disease	22.5565	19.8214	16.6687	14.8475
	Chronic renal failure	4.21273	4.30634	2.21237	2.05996
	Gout	18.7452	19.4181	13.7971	14.3243
	Cirrhosis	3.15823	2.55284	1.96066	1.48409
	Chronic hepatitis	2.87392	2.36561	2.34173	1.75392
	Crohn’s disease and ulcerative colitis	1.62753	1.67069	1.36529	1.50383
	Gastroesophageal disease	5.71791	5.55215	5.41286	5.26177
	Cerebrovascular disease	17.6458	15.4899	18.3224	16.3842
	Other neurological pathologies	1.09675	1.07659	0.921885	0.964165
	Dementia*	17.269	16.4404	28.4319	28.1747
	Parkinson disease	6.47402	6.47031	5.30922	5.40656
	Depression	18.9089	18.3596	28.1117	28.3589
	Psychiatric disorders	6.59901	7.61531	8.33359	9.89832
	Epilepsy	8.49764	9.01235	8.87597	9.51002
	Neoplasms	30.2056	27.5231	21.3639	19.8263
	Prostatic hyperplasia	31.6994	32.834	0.0600044	0.069104
	Rheumatologic conditions	9.35762	8.1518	13.2321	10.9349
	Osteoposis and Paget disease	4.27259	3.58262	12.4614	10.7012
